# Supplementary material for: Effects of psilocybin, psychedelic mushroom extract and 5-hydroxytryptophan on brain immediate early gene expression: Interaction with serotonergic receptor modulators
Source: Front Pharmacol. 2024 Apr 18;15:1391412. doi: 10.3389/fphar.2024.1391412 (PMC11063716; doi:10.3389/fphar.2024.1391412)
Supplement: Supplementary file 2 [file DataSheet2.xlsx]

## Sheet: Expt 2 PSIL PME
Sample	Group	Egr1	Egr2	cFos
8051	Vehicle	1.01455	0.534584	0.682731
8056	Vehicle		1.60563	0.942412
8061	Vehicle	0.987114	1.99959	1.01697
8066	Vehicle	0.954486	1.49497	1.00765
8071	Vehicle	0.887809	1.13409	0.878309
8076	Vehicle	1.06518	0.742477
8081	Vehicle	1.03885	0.698024	0.977298
8086	Vehicle	0.927704	0.788689	1.00588
8091	Vehicle	0.805481	0.692761	0.747812
8096	Vehicle	0.991097	1.2136	1.2994
8052	PSIL	1.1942	1.04717	0.937334
8057	PSIL	1.25077	1.24284	1.296
8062	PSIL	1.17323	1.02745	1.3734
8067	PSIL	1.10166	1.38774	1.49328
8072	PSIL	1.21302	1.18427	1.26294
8077	PSIL	1.37708	0.574853	1.74329
8082	PSIL	1.1906	1.09326	1.65744
8087	PSIL	0.821784	0.810405	1.25193
8092	PSIL	1.28108	0.98223	1.36044
8097	PSIL	0.914059	0.8893	1.29053
8053	PME	1.20641	1.53008	1.42903
8058	PME	1.08477	2.03363	1.18437
8063	PME	0.960055	0.404537	1.33321
8068	PME	1.2661	0.595253	1.43723
8073	PME	1.24977	1.24001	1.75191
8078	PME		1.47006	2.0124
8083	PME	1.19326	0.676118	1.19489
8088	PME	1.18162	0.722163	0.992549
8093	PME	0.989185	0.776887	1.01143
8098	PME	1.0653	0.832677	1.56044
